# Supplementary material for: Bioinorganic supplementation of calcium phosphate-based bone substitutes to improvein vivoperformance: a systematic review and meta-analysis of animal studies
Source: Royal Society of Chemistry journal article supplement (doi:10.1039/d0bm00599a), 2020-01-01
Supplement: d0bm00599a2.xlsx [file d0bm00599a2.xlsx]

## Sheet: Sheet1
article code	year	title	language	species	strain	age (weeks)	gender (m/f)	weight (g)	Number animals (used for implantation)	Number of groups (relevant for SR)	Defects/group/time point	Defects/animal	Healthy/Disease	Induction of disease	Type of bioinorganic	% bioinorganic	Material	Surgical site	Bone defect size (diameter or diameter*depth, in mm)	Implantation period	Outcome
Cho2014	2014	Enhanced bioactivity and osteoconductivity of hydroxyapatite through chloride substitution	English	Rabbit	New Zealand	NA	m	2000-2500	8	2	8	2	Healthy	NA	Cl	NA	HA disks	Calvaria	8	4 weeks	NFB (%); Implanted granules (%)
Rentsch2018	2018	Trivalent chromium incorporated in a crystalline calcium phosphate matrix accelerates materials degradation and bone formation in vivo	English	Rat	Wistar	Adult	m	350	30	3	10	2	Healthy	NA	Cr	10 and 50mmol	CPC (brushite)	Tibia	3*4	3 and 6 months	NFB (%); RM (%)
Li2018	2018	Transplantation of copper-doped calcium polyphosphate scaffolds combined with copper (II) preconditioned bone marrow mesenchymal stem cells for bone defect repair	English	Rabbit	Japanese white	adult	m	2500-3400	40	4 (2)	5	1	Healthy	NA	Cu	NA	CPP	Tibia	5	4 and 8 weeks	NFB (%)				BMD	Bome mineral density
Laufer1988	1988	Enhancing effects of fluoride-containing ceramic implants on bone formation in the dog femur	English	Dog	NA	1-2 yr	NA	NA	5	4 (2)	5	8	Healthy	NA	F	0.5	CaP cylinders	Femur	4*10	8 months	Histology ##				NFB	newly formed bone
Inoue2005	2005	In vivo effect of fluoride-substituted apatite on rat bone	English	Rat	Wistar	8	m	300	8	4	2	2	Healthy	NA	F	0,48; 0,91 and 2,23	CDA	Tibia	2	1 and 2 weeks	NFB (%)				RM	residual material
Inoue2011	2011	Effect of fluoride-substituted apatite on in vivo bone formation	English	Rat	Wistar	8	m	NA	8	4	2	2	Healthy	NA	F	0,48; 0,91 and 2,23	CDA	Tibia	2	1 and 2 weeks	Histology ##				CPP	Calcium polyphosphate
Bose2018	2018	Enhanced In Vivo Bone and Blood Vessel Formation by Iron Oxide and Silica Doped 3D Printed Tricalcium Phosphate Scaffolds	English	Rat	Sprague-Dawley	skeletally mature	m	300-350	24	3 (2)	NA	NA	Healthy	NA	Fe	NA	β-TCP	Femur	6.9*10.9	4, 8 and 12 weeks	NFB (%) #				CDA	Calcium deficient apatite
Li2016b	2016	Effect of a lithium-doped calcium phosphate cement in promoting tibial bone defect repair in rats. [Chinese]	Chinese	Rat	Sprague-Dawley	6 month	f	320-340	20	2	10	2	Healthy	NA	Li	NA	CPC	Tibia	2.5*4	1 and 2 months	NFB (%)
Deng2017	2017	Repair of the calvarial defect in goat model using magnesium-doped porous hydroxyapatite combined with recombinant human bone morphogenetic protein-2	English	Goat	NA	Adult	m & f	20-25 kg	18	3 (2)	4	2	Healthy	NA	Mg	NA	Ha	Calvaria	15	4, 8, 12 weeks	NFB (%)
Cabrejos-Azama2014	2014	Magnesium substitution in brushite cements for enhanced bone tissue regeneration	English	Rabbit	New Zealand	6 months	NA	2400-3100	7	4	3,5	2	Healthy	NA	Mg	6,67; 26,67 and 40	Crushed CPC (brushite)	Calvaria	10	8 weeks	NFB (%); RM (%) #
Tripathi2018	2018	In vivo stability evaluation of Mg substituted low crystallinity s-tricalcium phosphate granules fabricated through dissolution-precipitation reaction for bone regeneration	English	Rabbit	Japanese white	19	m	3000-3500	12	2	4	2	Healthy	NA	Mg	NA	β-TCP	Femur	6*4	4, 12 and 24 weeks	RM (%)
Wei2010	2010	Hierarchically microporous/macroporous scaffold of magnesium-calcium phosphate for bone tissue regeneration	English	Rabbit	New Zealand	NA	NA	3500	48	4	6	2	Healthy	NA	Mg	NA	CPC (apatite)	Femur	6*5	1, 2, 3 and 6 months	NFB (%)
Wu2008	2008	Self-setting bioactive calcium–magnesium phosphate cement with high strength and degradability for bone regeneration	English	Rabbit	New Zealand	NA	NA	3000	24	2	3	1	Healthy	NA	Mg	NA	CPC (apatite)	Femur	4*3	1, 2, 3 and 6 months	NFB (%)
Zeng2012	2012	Maxillary Sinus Floor Elevation Using a Tissue-Engineered Bone with Calcium-Magnesium Phosphate Cement and Bone Marrow Stromal Cells in Rabbits	English	Rabbit	New Zealand	NA	m	2000-2500	36	6 (2-3)	6	2	Healthy	NA	Mg	NA	CPC (brushite)	Maxilla	NA	2 and 8 weeks	NFB (%); RM (%)
Costa2016	2016	Osteogenic effect of tricalcium phosphate substituted by magnesium associated with Genderm(R) membrane in rat calvarial defect model	English	Rat	Wistar	NA	f	300	72	6 (2)	6	1	Healthy	NA	Mg	NA	β-TCP granules	Calvaria	8	1 and 6 months	NFB (%); RM (%); Connective tissue (%)
Yassuda2013	2013	Magnesium incorporation into b-TCP reduced its in vivo resorption by decreasing parathormone production	English	Rat	Wistar	NA	NA	250	45	3 (2)	5	1	Healthy	NA	Mg	NA	β-TCP granules	Maxilla	NA	1, 3 and 6 weeks	NFB (mm3); RM (mm3) #
Schendel2009	2009	Magnesium-based bone cement and bone void filler: preliminary experimental studies	English	Rabbit	New Zealand	NA	NA	NA	24	3 (2)	NA	2	Healthy	NA	Mg, OsteoCrete	NA	CPC (apatite)	Calvaria	10*15 (square)	2, 12 and 24 weeks	NFB #
Zhang2013	2013	RhBMP-2-loaded calcium silicate/calcium phosphate cement scaffold with hierarchically porous structure for enhanced bone tissue regeneration	English	Rabbit	New Zealand	NA	f	2500	24	4 (2)	6	1	Healthy	NA	S	7.5	CPC (brushite)	Femur	5*10	8 weeks	NFB (%)
Aparicio2016	2016	Effect of physicochemical properties of a cement based on silicocarnotite/calcium silicate on in vitro cell adhesion and in vivo cement degradation	English	Rabbit	New Zealand	6 month	f	3000-3400	9	6 (5)	3	2	Healthy	NA	Si	10; 20; 40 and 80	Grounded CPC (brushite)	Calvaria	10	8 weeks	NFB (%); RM (%)
Bunpetch2018	2018	Silicate-based bioceramic scaffolds for dual-lineage regeneration of osteochondral defect	English	Rabbit	New Zealand	Adult	m	2500-3000	NA	3 (2)	7	2	Healthy	NA	Si	NA	β-TCP	Femur	4*5	8 and 16 weeks	NFB (%)
Calvo-Guirado2015	2015	Biphasic b-TCP mixed with silicon increases bone formation in critical site defects in rabbit calvaria	English	Rabbit	New Zealand	30-35	NA	3900-4500	21	3 (2)	7	2	Healthy	NA	Si	3	HA and β-TCP granules (4Bone)	Calvaria	12	8 and 12 weeks	NFB (%); RM (%)
Camire2006	2006	Material characterization and in vivo behavior of silicon substituted alpha-tricalcium phosphate cement	English	Rabbit	Holland lop	NA	NA	4000-5500	6	2	6**	2	Healthy	NA	Si	1	CPC (apatite)	Tibia	Chamber of 1*1*5 mm	1, 2 and 3 weeks	Histology ##
Gong2016	2016	A Comprehensive Study of Osteogenic Calcium Phosphate Silicate Cement: Material Characterization and In Vitro/In Vivo Testing	English	Rabbit	New Zealand	5-9 months	f	1500-2100	42	3	14	2	Healthy	NA	Si	NA	CPC	Tibia	3*6	8 and 12 weeks	NFB and RM #
Hing2006	2006	Effect of silicon level on rate, quality and progression of bone healing within silicate-substituted porous hydroxyapatite scaffolds	English	Rabbit	New Zealand	NA	f	NA	NA	5	4	2	Healthy	NA	Si	0,2; 0,4; 0,8 and 1,5	HA cylinders	Femur	4,8 ± 0,3*6-7	1, 3, 6 and 12 weeks	Normalized NFB (%)
Ke2017	2017	Enhancing the Osteogenic Capability of Core-Shell Bilayered Bioceramic Microspheres with Adjustable Biodegradation	English	Rabbit	New Zealand	4.5 months	m	3000-3500	48	4 (3)	8	2	Healthy	NA	Si	NA	β -TCP microspheres	Femur	6*8	6, 12 and 18 weeks	NFB (%); RM (%)
Liu2013	2013	The effect of calcium silicate on in vitro physiochemical properties and in vivo osteogenesis, degradability and bioactivity of porous beta-tricalcium phosphate bioceramics	English	Rabbit	New Zealand	6 month	NA	4000 ± 500	72	4 (3)	6	1	Healthy	NA	Si	NA	β-TCP	Femur	6*10	4, 12 and 26 weeks	NFB (%); Degradation rate (%)
Mate-SanchezDeVal2012	2012	Physical properties, mechanical behavior, and electron microscopy study of a new alpha-TCP block graft with silicon in an animal model	English	Rabbit	New Zealand	NA	m	3500-4500	15	3	20	4	Healthy	NA	Si	1,5 and 3	HA block	Tibia	6	60 days	NFB (%)
Patel2002	2002	A comparative study on the in vivo behavior of hydroxyapatite and silicon substituted hydroxyapatite granules	English	Rabbit	New Zealand	6 month	f	3000	NA	2	NA	2	Healthy	NA	Si	0.8	HA granules	Femur	4*7	23 days	NFB (%) #
Preethanath2016	2016	Combined Treatment Effects Using Bioactive-Coated Implants and Ceramic Granulate in a Rabbit Femoral Condyle Model	English	Rabbit	New Zealand	6 months	m	4-5 kg	16	4 (2)	8	2	Healty	NA	Si	NA	HA granules	Femur	5*8	8 weeks	NFB (%)
Velasquez2013	2013	aTCP ceramic doped with dicalcium silicate for bone regeneration applications prepared by powder metallurgy method: In vitro and in vivo studies	English	Rabbit	New Zealand	30-35	m	4000-4200	15	4 (3)	5	4	Healthy	NA	Si	1,5 and 3	α-TCP	Tibia	6*8	2, 4 and 8 weeks	RM (%) #
Wang2012	2012	The enhancement of bone regeneration by a combination of osteoconductivity and osteostimulation using beta-CaSiO3/beta-Ca3(PO4)2 composite bioceramics	English	Rabbit	New Zealand	3 month	NA	2500-2800	40	4 (3)	5	2	Healthy	NA	Si	20 and 50	β-TCP scaffold	Femur	6	4, 12 and 26 weeks	NFB (%), degradation rate (%)
Xu2008	2008	Reconstruction of calvarial defect of rabbits using porous calcium silicate bioactive ceramics		Rabbit	New Zealand	>3 month	NA	2600-2800	12	2	4	2	Healthy	NA	Si	NA	β-TCP disks	Calvaria	10	4, 8 and 16 weeks	NFB (%); RM (%)
Chissov2008	2008	Study of in vivo biocompatibility and dynamics of replacement of rat shin defect with porous granulated bioceramic materials	English	Rat	Wistar	NA	m	NA	108	6 (2)	3	1	Healthy	NA	Si	0.79	HA granules	Tibia	5-7 (segmental)	3, 6, 9, 12 weeks and 6 and 9 months	Histology ##
Kamitakahara2016	2016	Effect of silicate incorporation on in vivo responses of alpha-tricalcium phosphate ceramics	English	Rat	Wistar	8	NA	NA	24	2	3	1	Healthy	NA	Si	5	α-TCP granules	Femur	2*3	4, 8, 12 and 24 weeks	NFB (%); RM (%)
Roh2016	2016	Bone Regeneration Using a Mixture of Silicon-Substituted Coral HA and beta-TCP in a Rat Calvarial Bone Defect Model	English	Rat	Sprague-Dawley	NA	NA	250-300	60	6 (2)	6*	1	Healthy	NA	Si	NA	MBCP™	Calvaria	8	4 and 8 weeks	BMD (mg/cm3)
Vahabzadeh2015	2015	Effects of Silicon on Osteoclast Cell Mediated Degradation, In Vivo Osteogenesis and Vasculogenesis of Brushite Cement	English	Rat	Sprague-Dawley	NA	m	300	18	4	3	2	Healthy	NA	Si	0,5; 0,8 and 1,1	CPC (brushite)	Femur	3	4, 8 and 12 weeks	NFB (%)
Patel2005	2005	In vivo assessment of hydroxyapatite and silicate-substituted hydroxyapatite granules using an ovine defect model	English	Sheep	Texcel x Continental	2-3 year	NA	70-80 kg	NA	3	4	2	Healthy	NA	Si	0,8 and 1,5	HA granules	Femur	9*9	6 and 12 weeks	NFB (%)
Porter2003	2003	Comparison of in vivo dissolution processes in hydroxyapatite and silicon-substituted hydroxyapatite bioceramics	English	Sheep	Texcel x continental	2-3 yr	NA	70-80 kg	NA	2	NA	2	Healty	NA	Si	0,8 and 1,5	HA granules	Femur	9*9	6 and 12 weeks	Histology ##
Vestermark2011	2011	Strontium doping of bone graft extender: Effect on fixation of allografted experimental implants	English	Dog	American foxhund	12.5±1.2	f	25.1±1 kg	10	2	10	2	Healthy	NA	Sr	NA	HA granules	Humerus	11*12	4 weeks	NFB (%)
Dagang2008	2008	The influence of Sr doses on the in vitro biocompatibility and in vivo degradability of single-phase Sr-incorporated HAP cement	English	Rabbit	New Zealand	8-10 months	NA	2400-2600	24	4 (3)	1	1	Healthy	NA	Sr	5 and 10	CPC (apatite)	Femur	2.2	4, 8, 12 and 24 weeks	Resorption degree #
Gu2001	2001	[The experimental study of Sr-HAP on reconstructing mandibular bone defect]	Chinese	Rabbit	New Zealand	NA	NA	NA	24	4 (3)	4	2	Healthy	NA	Sr	5 and 10	HA blocks	Mandible	6*12*4	1, 3 and 6 months	NFB (%) #
Gu2013	2013	Acceleration of segmental bone regeneration in a rabbit model by strontium-doped calcium polyphosphate scaffold through stimulating VEGF and bFGF secretion from osteoblasts	English	Rabbit	New Zealand	NA	NA	2500 ± 400	72	6 (2)	4	1	Healthy	NA	Sr	NA	CPP	Radius	15 (segmental)	4, 8 and 16 weeks	NFB/RM ratio #
Kang2015	2015	Repairing defect and preventing collapse of femoral head in a steroid-induced osteonecrotic of femoral head animal model using strontium-doped calcium polyphosphate combined BM-MNCs	English	Rabbit	Japanese white	28-30	m	2800-3400	68	3 (2)	6	2	Osteonecrosis	Steroid	Sr	NA	CPP	Femur	3	4, 8 and 12 weeks	NFB #
Kaygili2015	2015	Strontium substituted hydroxyapatites: Synthesis and determination of their structural properties, in vitro and in vivo performance	English	Rabbit	New Zealand	9 months	m	NA	49	7 (6)	28	4	Healthy	NA	Sr	0,45; 0,9; 1,35; 1,8 and 2,25	HA	Tibia	3.2	4 weeks	NFB #
Liao2002	2002	A fundamental study on bioreactions of Sr-HA. [Chinese]	Chinese	Rabbit	New Zealand	NA	NA	NA	24	4 (3)	4	2	Healthy	NA	Sr	5 and 10	HA	Mandible	6*12*4	1, 3 and 6 months	Histology ##
Luo2018	2018	3D printing of strontium-doped hydroxyapatite based composite scaffolds for repairing critical-sized rabbit calvarial defects	English	Rabbit	New Zealand	adult	NA	NA	NA	3 (2)	NA	1	Healthy	NA	Sr	NA	HA	Calvaria	15	4, 8 and 12 weeks	NFB (%) #
Mohan2013	2013	Strontium calcium phosphate for the repair of leporine (Oryctolagus cuniculus) ulna segmental defect	English	Rabbit	New Zealand	NA	m	2500	12	2	3	1	Healthy	NA	Sr	NA	HA	Ulna	15 (segmental)	4 and 12 weeks	NFB (%); RM (%)
Tian2009	2009	In vivo study of porous strontium-doped calcium polyphosphate scaffolds for bone substitute applications	English	Rabbit	New Zealand	NA	NA	2500±400	48	2	8	1	Healthy	NA	Sr	NA	CPP	Radius	15 (segmental)	4, 8 and 16 weeks	NFB (%); RM (%)
Valiense2016	2016	In vitro and in vivo evaluation of strontium-containing nanostructured carbonated hydroxyapatite/sodium alginate for sinus lift in rabbits	English	Rabbit	New Zealand	5-6 months	m & f	NA	12	2	6	2	Healthy	NA	Sr	NA	Carbonated HA granules	Maxilla	4	4 and 12 weeks	NFB (%); RM (%)
Zarins2018	2018	Immunohistochemical evaluation after Sr-enriched biphasic ceramic implantation in rabbits femoral neck: comparison of seven different bone conditions	English	Rabbit	California	8	f	2300-2600	30	4 (2)	7	1	Osteoporosis	ovariectomized	Sr	NA	HA/TCP	Femur	5*4	12 weeks	Histology ##
Baier2013	2013	Strontium enhances osseointegration of calcium phosphate cement: a histomorphometric pilot study in ovariectomized rats	English	Rat	Sprague-Dawley	10	f	NA	60	2	10*	1	Osteoporosis	ovariectomized	Sr	NA	CPC (apatite)	Femur	2	1,3 and 6 months	NFB (%)
Cardemil2013	2013	Strontium-Doped Calcium Phosphate and Hydroxyapatite Granules Promote Different Inflammatory and Bone Remodelling Responses in Normal and Ovariectomised Rats	English	Rat	Sprague-Dawley	4 months	f	322 and 317 (mean)	64	4	8	2	Healthy and osteoporosis	ovariectomized	Sr	NA	HA granules	Femur	2.3	6 days and 4 weeks	NFB (%); RM (%) #
Carmo2018	2018	Alveolar bone repair with strontium- containing nanostructured carbonated hydroxyapatite	English	Rat	Wistar	NA	m	300	20	2	5	1	Healthy	NA	Sr	NA	Carbonated HA	Maxilla	NA	1 and 6	NFB (%); RM (%)
Chandran2016	2016	Osteogenic efficacy of strontium hydroxyapatite micro-granules in osteoporotic rat model	English	Rat	Wistar	3 months	f	200 ± 20	NA (9)	3 (2)	6	2	osteoporosis	ovariectomized	Sr	10	HA granules	Femur	3*1,5	8 weeks	Regeneration efficiency ratio #
Cheng2014	2014	Preliminary evaluation of different biomaterials for defect healing in an experimental osteoporotic rat model with dynamic PET-CT (dPET-CT) using F-18-sodium fluoride (NaF)	English	Rat	Sprague-Dawley	3 months	m?	250-400	21	3 (2)	7	1	Osteoporosis	ovariectomized	Sr	NA	CPC	Femur	4 mm (lateral (wedge defect)	6 weeks	Histology ##
Elgali2016	2016	Guided bone regeneration using resorbable membrane and different bone substitutes: Early histological and molecular events	English	Rat	Sprague-Dawley	NA	m	320-350	84	3 (2)	6	2	Healthy	NA	Sr	50	HA granules	Femur	2,3*3	12h, 3 and 6 days	NFB (%)
Guo2018	2018	RNA-Seq investigation and in vivo study the effect of strontium ranelate on ovariectomized rat via the involvement of ROCK1	English	Rat	Sprague-Dawley	3 months	f	NA	20	2	10	2	Osteoporosis	ovariectomized	Sr	200 mM	Nano-HA particles	Femur	3.5*5	4 and 8 weeks	NBF (%)
Kuang2015	2015	Strontium exerts dual effects on calcium phosphate cement: Accelerating the degradation and enhancing the osteoconductivity both in vitro and in vivo	English	Rat	Sprague-Dawley	3 months	NA	NA	30	2	5	1	Healthy	NA	Sr	5 and 10	CPC	Femur	2.5*4	32 weeks	NFB (%); RM (%) #
Li2016a	2016	Cancellous bone healing around strontium-doped hydroxyapatite in osteoporotic rats previously treated with zoledronic acid	English	Rat	Sprague-Dawley	3 months	f	NA	26	2	13	1	Osteoporosis	ovariectomized	Sr	10	HA	Tibia	1*5	8 weeks	NFB (%)
Masaeli2016	2016	Efficacy of the biomaterials 3wt%-nanostrontium-hydroxyapatite-enhanced calcium phosphate cement (nanoSr-CPC) and nanoSr-CPC-incorporated simvastatin-loaded poly(lactic-co-glycolic-acid) microspheres in osteogenesis improvement: An explorative multi-phase experimental in vitro/vivo study	English	Rat	Sprague-Dawley	10	m	250-290	10	3 (2)	10	3	Healthy	NA	Sr	3	CPC (brushite)	Calvaria	5	4 weeks	Histology ##
Muller2017	2017	Fabrication of amorphous strontium polyphosphate microparticles that induce mineralization of bone cells in vitro and in vivo	English	Rat	Sprague-Dawley	6	m	190 ± 30	NA	3 (2)	NA	1	Healthy	NA	Sr	NA	CPP	Calvaria	10	8 and 12 weeks	Histology ##
Salamanna2019	2019	Antiresorptive properties of strontium substituted and alendronate functionalized hydroxyapatite nanocrystals in an ovariectomized rat spinal arthrodesis model	It was congress, but article is out!	Rat	Sprague-Dawley	3 months	f	200±50	50 (OVX) +25 (Sham)	10 (6)	10*	2	Osteoporosis	ovariectomized	Sr	NA	HA nanocrystals	Vertebra	NA	8 weeks	NFB (%) #
Tao2018	2018	Effects of strontium-modified calcium phosphate cement combined with bone morphogenetic protein-2 on osteoporotic bone defects healing in rats	English	Rat	Sprague-Dawley	3 months	f	230	40	4 (2)	5	1	Osteoporosis	ovariectomized	Sr	NA	CPC	Femur	3*5	8 weeks	NFB (%); RM (%)
Thormann2013	2013	Bone formation induced by strontium modified calcium phosphate cement in critical-size metaphyseal fracture defects in ovariectomized rats	English	Rat	Sprague-Dawley	10	f	250-290	45	3 (2)	15	1	Osteoporosis	ovariectomized	Sr	NA	CPC (apatite)	Femur	4 mm (lateral length) * 0,35 mm (medial gap)-wedge	6 weeks	NFB (%)
Yu2017	2017	Strontium-Doped Amorphous Calcium Phosphate Porous Microspheres Synthesized through a Microwave-Hydrothermal Method Using Fructose 1,6-Bisphosphate as an Organic Phosphorus Source: Application in Drug Delivery and Enhanced Bone Regeneration	English	Rat	Sprague-Dawley	NA	NA	NA	18	3 (2)	12	2	Healthy	NA	Sr	10 mol	ACP porous microspheres	Calvaria	5*2	8 weeks	NFB (%)
Chandran2018	2018	Strontium Hydroxyapatite scaffolds engineered with stem cells aid osteointegration and osteogenesis in osteoporotic sheep model	English	Sheep	South Indian	10-12 years	f	25-28 kg	10 (8)	4 (2)	2	1	Osteoporosis	ovariectomized	Sr	10	HA	Femur	12*4	2 months	Regeneration efficiency ratio
Machado2016	2016	Histomorphometric evaluation of strontium-containing nanostructured hydroxyapatite as bone substitute in sheep	English	Sheep	Santa Ines	NA	f	31-35 kg	6 (5)	3 (2)	5	3	Healthy	NA	Sr	1	HA microspheres	Tibia	2	30 days	NFB (%); RM (%)
Reitmaier2018	2017	Strontium(II) and mechanical loading additively augment bone formation in calcium phosphate scaffolds	English	Sheep	Merino	3-5 year	f	70-110 kg	14	2	7	4	Healthy	NA	Sr	NA	CPC (apatite)	Femur and tibia	10*15 + 10*24*6	6 and 26 weeks	NFB (%); RM (%)
Calasans-Maia2014	2014	Short-term in vivo evaluation of zinc-containing calcium phosphate using a normalized procedure	English	Rabbit	New Zealand	NA	m and f	2500-3000	15	2	10	4	Healthy	NA	Zn	NA	HA cylinders	Tibia	2	1, 2 and 4 weeks	NFB (%) #
Kawamura2000	2000	Stimulatory effect of zinc-releasing calcium phosphate implant on bone formation in rabbit femora	English	Rabbit	New Zealand	NA	f	3000-3500	29	8	6	2	Healthy	NA	Zn	0,063; 0,316 and 0,633	TCP and TCP/HA ceramics	Femur	2.6	4 weeks	NFB (%)
Kawamura2003	2003	Long-term implantation of zinc-releasing calcium phosphate ceramics in rabbit femora	English	Rabbit	New Zealand	NA	f	3000-3400	39	2	6	2	Healthy	NA	Zn	0.316	TCP/HA ceramic	Femur	2.6	2, 4, 6, 12, 24 and 60 weeks	NFB (%)
Li2009	2009	The optimum zinc content in set calcium phosphate cement for promoting bone formation in vivo	English	Rabbit	New Zealand	NA	m	3000	6	2	6	2	Healthy	NA	Zn	0.04	CPC (apatite)	Tibia	3.6	4 weeks	NFB (%)
Resende2013	2013	Long-term biocompatibility evaluation of 0.5 % zinc containing hydroxyapatite in rabbits	English	Rabbit	New Zealand	Adult	m & f	2500-3000	15	2	5	2	Healthy	NA	Zn	0.5	HA spheres	Tibia	2	26, 52 and 78 weeks	RM (%)
Suruagy2016	2016	Physico-chemical and histomorphometric evaluation of Zinc-containing HA in rabbit calvaria	English	Rabbit	New Zealand	18-20	m	3000-3500	6	2	5	2	Healthy	NA	Zn	2	HA discs	Calvaria	8	12 weeks	NFB (%); RM (%)
Chou2013	2013	Bone regeneration of rat tibial defect by zinc-tricalcium phosphate (Zn-TCP) synthesized from porous foraminifera carbonate macrospheres	English	Rat	Wistar	15	m	NA	30	3 (2)	10**	1	Healthy	NA	Zn	5	β-TCP	Tibia	2*3	0, 4 and 8 weeks	BMD (mg/cm3)
Pina2010	2010	Biological responses of brushite-forming Zn-and ZnSr-substituted beta-Tricalcium phosphate bone cements	English	Pig	NA	Mature	m	40-50 kg	2	3 (2)	1	3	Healthy	NA	Zn and Sr	NA	CPC (brushite)	Tarsal bone	3,5*10	1 month	NFB #
