# Supplementary material for: Bioinorganic supplementation of calcium phosphate-based bone substitutes to improvein vivoperformance: a systematic review and meta-analysis of animal studies
Source: Royal Society of Chemistry journal article supplement (doi:10.1039/d0bm00599a), 2020-01-01
Supplement: d0bm00599a3.pdf [file d0bm00599a3.pdf]

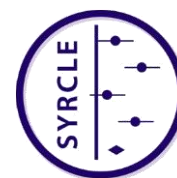

## SYSTEMATIC REVIEW PROTOCOL FOR ANIMAL INTERVENTION STUDIES

FORMAT BY SYRCLE ([WWW.SYRCLE.NL](http://WWW.SYRCLE.NL))

VERSION 2.0 (DECEMBER 2014)

| Item #     | Section/Subsection/Item                                                                             | Description                                                                                                                                                                                                                                                                                                                                                                                                                                                                                                                                                                                                                                                                                                                                                                                                                                              | Check for approval |
|------------|-----------------------------------------------------------------------------------------------------|----------------------------------------------------------------------------------------------------------------------------------------------------------------------------------------------------------------------------------------------------------------------------------------------------------------------------------------------------------------------------------------------------------------------------------------------------------------------------------------------------------------------------------------------------------------------------------------------------------------------------------------------------------------------------------------------------------------------------------------------------------------------------------------------------------------------------------------------------------|--------------------|
| 1.         | Title of the review                                                                                 | <b>The influence of bioinorganic elements included in calcium phosphate based bone substitutes on bone regeneration: a systematic review and meta-analysis</b>                                                                                                                                                                                                                                                                                                                                                                                                                                                                                                                                                                                                                                                                                           |                    |
| 2.         | Authors (names, affiliations, contributions)                                                        | Drs. E.C. Grosfeld, PhD student, department of Biomaterials, Radboudumc<br>I. Lodoso-Torrecilla, Msc., PhD student, department of Biomaterials, Radboudumc<br>Dr. J.W. Hoekstra, department of Biomaterials, Radboudumc<br>Dr. R. de Vries, SYRCLE, Radboudumc<br>Prof. Dr. D. Ulrich, department of Plastic, reconstructive and hand surgery, Radboudumc<br>Prof. Dr. J. Jansen, department of Biomaterials, Radboudumc<br>Dr. J. van den Beucken, department of Biomaterials, Radboudumc                                                                                                                                                                                                                                                                                                                                                               |                    |
| 3.         | Other contributors (names, affiliations, contributions)                                             | Elmie Peters, informatie specialist, Radboud Health Academy                                                                                                                                                                                                                                                                                                                                                                                                                                                                                                                                                                                                                                                                                                                                                                                              |                    |
| 4.         | Contact person + e-mail address                                                                     | Eline-Claire Grosfeld, eline-claire.grosfeld@radboudumc.nl                                                                                                                                                                                                                                                                                                                                                                                                                                                                                                                                                                                                                                                                                                                                                                                               |                    |
| 5.         | Funding sources/sponsors                                                                            | None                                                                                                                                                                                                                                                                                                                                                                                                                                                                                                                                                                                                                                                                                                                                                                                                                                                     |                    |
| 6.         | Conflicts of interest                                                                               | None                                                                                                                                                                                                                                                                                                                                                                                                                                                                                                                                                                                                                                                                                                                                                                                                                                                     |                    |
| 7.         | Date and location of protocol registration                                                          |                                                                                                                                                                                                                                                                                                                                                                                                                                                                                                                                                                                                                                                                                                                                                                                                                                                          |                    |
| 8.         | Registration number (if applicable)                                                                 |                                                                                                                                                                                                                                                                                                                                                                                                                                                                                                                                                                                                                                                                                                                                                                                                                                                          |                    |
| 9.         | Stage of review at time of registration                                                             | Selection of articles                                                                                                                                                                                                                                                                                                                                                                                                                                                                                                                                                                                                                                                                                                                                                                                                                                    |                    |
| Background |                                                                                                     |                                                                                                                                                                                                                                                                                                                                                                                                                                                                                                                                                                                                                                                                                                                                                                                                                                                          |                    |
| 10.        | What is already known about this disease/model/intervention? Why is it important to do this review? | The proper bone mass is achieved by presence of living cells (osteoblasts, osteoclasts, and osteocytes), organic matrix (mainly I-type collagen) and inorganic minerals (apatites). The inorganic composition of bone ( <u>bone mineral</u> ) is primarily formed from salts of <u>calcium</u> and <u>phosphate</u> , the major salt being <u>hydroxyapatite</u> ( $\text{Ca}_{10}(\text{PO}_4)_6(\text{OH})_2$ ). The exact composition of the matrix may change over time and with nutrition, with the ratio of <u>calcium</u> to <u>phosphate</u> varying between 1.3-2 (per weight), and trace minerals such as <b>Magnesium (Mg), Zinc (Zn), Strontium (Sr) and Fluorine (F)</b> also being found [1]. Trace minerals generally reduce the crystallinity of apatite, except for fluoride, which mainly increases the crystallinity of apatite. As a |                    |

consequence of the reduction of crystallinity, bone mineral becomes more soluble [2,3].

**Magnesium** is an essential element and the tenth most abundant element in the human body, with approximately 65% of the total magnesium contained in the bones and teeth [4]. In vivo studies have noted that calcium phosphate cement (CPC) doped with magnesium phosphate in the maxillary sinus floor elevation showed greater biodegradability and excellent osteoconductivity when compared to control CPC [5]. **Zinc** is required for the growth, development and maintenance of healthy bones, it stimulates osteoblasts, inhibits osteoclasts function and enhances bone protein synthesis, what increases bone mass and growth [6,7]. In studies with rats, the increase in bone zinc content resulted from lactation of maternal rats fed diet containing zinc [8,9]. Osteoporosis patients have been shown to have lower levels of skeletal zinc than the normal individuals [10]. Zinc supplementation could have beneficial effects on the bone density [8]. Zinc has been known to play an important role in various physiological processes. Zinc is utilized in structural, catalytic or regulatory actions of metalloenzymes, one of such enzymes is alkaline phosphatase (ALP). ALP is vital for the maturation of new bone formation. Furthermore, zinc deficiency is associated with a number of skeletal anomalies in fetal and postnatal development [11]. A number of studies have been performed in vitro to study the effect of the incorporation of zinc into calcium phosphate ceramics on the biological processes related to bone formation and turnover. One study investigated the osteogenic ability of rat and human BMSCs cultured in HA/TCP ceramics containing zinc in amounts varying between 0 and 1.3 wt%. Both rat and human BMSCs cultured in an osteogenic medium showed an increase in ALP expression with increasing zinc content in the HA/TCP ceramic [12]. In another study, a positive effect on the proliferation of the MC3T3 osteoblastic cell line was observed in HA/TCP ceramics containing up to 1.3 wt% zinc, whereas higher concentrations caused cytotoxicity [13]. **Strontium** can enhance bone regeneration when incorporated into synthetic bone grafts. Because it is similar to calcium in size, it is thought to displace calcium ions in osteoblast mediated processes. It is found that strontium most likely stimulates bone formation by a dual mode of action. First by activating the calcium sensing receptor (CaSR) in osteoblasts, which simultaneously increases osteoprotegerin (OPG) production and decreases the receptor activator of nuclear factor kappa beta ligand (RANKL) expression [14]. **Fluorine** enhances the stability of apatite lattice in bones and teeth [15].

Other elements present in bone tissue, such as **Copper**

**(Cu) and Silicon (Si)** also play an important role in bone formation. The presence of these elements in hydroxylapatite is important, because they cocreate bone cells: osteoblasts and osteoclasts, which take part in bone turnover and remodeling. **Copper** is important in collagen maturation [15, 16–18]. Copper is known for its stimulatory effect on angiogenesis in endothelial cells. Copper deficiency is potentially life threatening. Enhanced activity and proliferation of osteoblastic cells was observed when copper ions were loaded on CPC scaffolds. Mesoporous bioactive glass (MBG) scaffolds showed multifunctional characteristics, such as angiogenesis potential, osteostimulation, and antibacterial properties [19]. Other trace elements and minerals that are present in the human body and might also play a role in bone formation are **Sulfur (S) and Chlorine (Cl)**.

Among beneficially elements, there are also Cadmium (Cd), Lead (Pb), and Aluminium (Al), which may be toxic and cause bone demineralization and damage [20–22].

1. Hall, A.C., Guyton, J.E. (2005) Textbook of medical physiology (11<sup>th</sup> ed.) W.B. Saunders, Philadelphia.
2. Farbod, K. et al. (2014) Interactions Between Inorganic and Organic Phases in Bone Tissue as a Source of Inspiration for Design of Novel Nanocomposites. Tissue Engineering: Part B 20(2)
3. Morgan, E.F., Barnes, G.L. and Einhorn, T.A. The bone organ system: form and function. In: Marcus, R. Feldman, D., Nelson, D., and Rosen, C.J., eds. Fundamentals of Osteoporosis. San Diego, CA: Elsevier Academic Press, 2008, pp. 1-25.
4. Rude R.K. et al. (2005) Dietary magnesium reduction to 25% of nutrient requirement disrupts bone and mineral metabolism in the rat. Bone 37(2):211-219.
5. Zeng D. et al. (2012) Maxillary sinus Floor elevation using a tissue-engineered bone with calcium-magnesium phosphate cement and bone marrow stromal cells in rabbits. Tissue Eng Part A 18(7-8):870-881.
6. Yamaguchi, M., Gao, Y.H., and Ma, Z.J. (2000) Synergistic effect of genistein and zinc on bone components in the femoral-metaphyseal tissues of female rats. J. Bone Miner. Metab. 18, 77–83.
7. Bougle, D.L., Sabatier, J.P., Guaydier-Souquieres, G., Guillon-Metz, F., Laroche, D., et al. (2004) Zinc status and bone mineralisation in adolescent girls. J. Trace Elements Med. Biol. 18, 17–21.
8. Ma, Z.J. and Yamaguchi, M. (2001) Role of endogenous zinc in the enhancement of bone protein synthesis associated with bone growth of newborn rats. J. Bone Miner. Metab. 19, 38–44.

|  |  |                                                                                                                                                                                                                                                                                                                                                                                                                                                                                                                                                                                                                                                                                                                                                                                                                                                                                                                                                                                                                                                                                                                                                                                                                                                                                                                                                                                                                                                                                                                                                                                                                                                                                                                                                                                                                                                                                                                                                                                                                                                                                                                                                                                                                                                                                                                                                                                                                      |  |
|--|--|----------------------------------------------------------------------------------------------------------------------------------------------------------------------------------------------------------------------------------------------------------------------------------------------------------------------------------------------------------------------------------------------------------------------------------------------------------------------------------------------------------------------------------------------------------------------------------------------------------------------------------------------------------------------------------------------------------------------------------------------------------------------------------------------------------------------------------------------------------------------------------------------------------------------------------------------------------------------------------------------------------------------------------------------------------------------------------------------------------------------------------------------------------------------------------------------------------------------------------------------------------------------------------------------------------------------------------------------------------------------------------------------------------------------------------------------------------------------------------------------------------------------------------------------------------------------------------------------------------------------------------------------------------------------------------------------------------------------------------------------------------------------------------------------------------------------------------------------------------------------------------------------------------------------------------------------------------------------------------------------------------------------------------------------------------------------------------------------------------------------------------------------------------------------------------------------------------------------------------------------------------------------------------------------------------------------------------------------------------------------------------------------------------------------|--|
|  |  | <p>9. Ma, Z.J. and Yamaguchi, M. (2000) Alternation in bone components with increasing age of newborn rats: role of zinc in bone growth. <i>J. Bone Miner. Metab.</i> 18, 264–270.</p> <p>10. Reginster, J.Y., Strause, L.G., Saltman, O., and Franchimont, P. (1988) Trace elements and postmenopausal osteoporosis: A preliminary study of decreased serum manganese. <i>Med. Sci. Res.</i> 16, 337–338.</p> <p>11. H. Zreiqat, C. Dunstan, V. Rosen. (2015) A tissue regeneration approach to bone and cartilage repair. <i>Mechanical engineering series.</i></p> <p>12. Ikeuchi et al.</p> <p>13. Xue W. et al. (2008) Synthesis and characterization of tricalcium phosphate with Zn and Mg base dopants. <i>J Mater Sci Mater Med</i> 19(7):2669-2677.</p> <p>14. Coulombe J. et al. (2004) In vitro effects of strontium ranelate on the extracellular calcium-sensing receptor. <i>Biochem Biophys Res Commun</i> 323(4):1184-1190.</p> <p>15. Aoba, T. (1997) The effect of fluoride on apatite structure and growth. <i>Crit. Rev. Oral Biol. Med.</i> 8, 136–152.</p> <p>16. Cashman, K.D. (2006) Milk minerals (including trace elements) and bone health, <i>Int. Dairy J.</i> 16, 1389–1398.</p> <p>17. Ohta, T., Wergedal, J.E., Matsuyama, T., Baylink, D.J., and Wiliam Lau K.H. (1995) Phenytoin and fluoride act in concert to stimulate bone formation and to increase bone volume in adult male rats. <i>Calcified Tissue Int.</i> 56, 390–397.</p> <p>18. Rucker, R. and Murray, J. (1978) Cross-linking amino acids in collagen and elastin. <i>Am. J. Clin. Nutr.</i> 31, 1221–1236.</p> <p>19. Wu C. et al. (2013) Copper containing mesoporous bioactive glass scaffolds with multifunctional properties of angiogenesis capacity, osteostimulation and antibacterial activity. <i>Biomaterials</i> 34(2):422-433.</p> <p>20. Obi, F.O., and Olabode, I. O. (2002) Effects of cadmium exposure on bone and kidney alkaline phosphatase activity and acid phosphatase activity in testis and prostate gland in the male rats. <i>J. Appl. Sci. Environ. Mgt.</i> 6, 9–13.</p> <p>21. Pounds, J.G., Long, G.J., and Rosen, J.F. (1991) Cellular and molecular toxicity of lead in bone. <i>Environ. Health Perspect.</i> 91, 17–32.</p> <p>22. Zhu, J.M., huffer, W., and Alfrey, A.C. (1990) Effect of aluminum on bone matrix inductive properties. <i>Kidney Int.</i> 38, 1141–1145.</p> |  |
|--|--|----------------------------------------------------------------------------------------------------------------------------------------------------------------------------------------------------------------------------------------------------------------------------------------------------------------------------------------------------------------------------------------------------------------------------------------------------------------------------------------------------------------------------------------------------------------------------------------------------------------------------------------------------------------------------------------------------------------------------------------------------------------------------------------------------------------------------------------------------------------------------------------------------------------------------------------------------------------------------------------------------------------------------------------------------------------------------------------------------------------------------------------------------------------------------------------------------------------------------------------------------------------------------------------------------------------------------------------------------------------------------------------------------------------------------------------------------------------------------------------------------------------------------------------------------------------------------------------------------------------------------------------------------------------------------------------------------------------------------------------------------------------------------------------------------------------------------------------------------------------------------------------------------------------------------------------------------------------------------------------------------------------------------------------------------------------------------------------------------------------------------------------------------------------------------------------------------------------------------------------------------------------------------------------------------------------------------------------------------------------------------------------------------------------------|--|

|     |                                    |              |  |
|-----|------------------------------------|--------------|--|
|     | Research question                  |              |  |
| 11. | Specify the disease/health problem | Bone defects |  |

|                                                              |                                                                                                                                         |                                                                                                                                                                                                                                                                                                                                                                                                             |  |
|--------------------------------------------------------------|-----------------------------------------------------------------------------------------------------------------------------------------|-------------------------------------------------------------------------------------------------------------------------------------------------------------------------------------------------------------------------------------------------------------------------------------------------------------------------------------------------------------------------------------------------------------|--|
|                                                              | of interest                                                                                                                             |                                                                                                                                                                                                                                                                                                                                                                                                             |  |
| 12.                                                          | Specify the population/species studied                                                                                                  | All animal models                                                                                                                                                                                                                                                                                                                                                                                           |  |
| 13.                                                          | Specify the intervention/exposure                                                                                                       | Bioinorganic elements included in calcium phosphate based bone substitutes                                                                                                                                                                                                                                                                                                                                  |  |
| 14.                                                          | Specify the control population                                                                                                          | Bone substitutes without bioinorganic elements                                                                                                                                                                                                                                                                                                                                                              |  |
| 15.                                                          | Specify the outcome measures                                                                                                            | Bone formation                                                                                                                                                                                                                                                                                                                                                                                              |  |
| 16.                                                          | State your research question (based on items 11-15)                                                                                     | <p>Hypothesis: the presence of various bioinorganic elements in calcium phosphate based bone substitutes is associated with the enhancement of new bone formation due to various, element-associated properties.</p> <p>Research question: does the addition of bioinorganic elements to calcium phosphate based bone substitutes increase the quantity of bone formation in animals with bone defects?</p> |  |
| Search and study identification                              |                                                                                                                                         |                                                                                                                                                                                                                                                                                                                                                                                                             |  |
| 17.                                                          | Identify literature databases to search (e.g. Pubmed, Embase, Web of science)                                                           | <input checked="" type="checkbox"/> <b>MEDLINE via PubMed</b> <input type="checkbox"/> Web of Science<br><input type="checkbox"/> SCOPUS <input checked="" type="checkbox"/> <b>EMBASE</b><br><input type="checkbox"/> Other, namely:<br><input type="checkbox"/> Specific journal(s), namely:                                                                                                              |  |
| 18.                                                          | Define electronic search strategies (e.g. use the step by step search guide <sup>15</sup> and animal search filters <sup>20, 21</sup> ) | When available, please add a supplementary file containing your search strategy: <b><u>Search 17052017 V2.0</u></b>                                                                                                                                                                                                                                                                                         |  |
| 19.                                                          | Identify other sources for study identification                                                                                         | <input checked="" type="checkbox"/> <b>Reference lists of included studies</b> <input type="checkbox"/> Books<br><input checked="" type="checkbox"/> <b>Reference lists of relevant reviews</b><br><input type="checkbox"/> Conference proceedings, namely:<br><input type="checkbox"/> Contacting authors/ organisations, namely:<br><input type="checkbox"/> Other, namely:                               |  |
| 20.                                                          | Define search strategy for these other sources                                                                                          | Screen the reference lists of included studies and relevant reviews for articles that should be included.                                                                                                                                                                                                                                                                                                   |  |
| Study selection                                              |                                                                                                                                         |                                                                                                                                                                                                                                                                                                                                                                                                             |  |
| 21.                                                          | Define screening phases (e.g. pre-screening based on title/abstract, full text screening, both)                                         | <b>1. Pre-screening based on title and abstract</b><br><b>2. Full text screening</b>                                                                                                                                                                                                                                                                                                                        |  |
| 22.                                                          | Specify (a) the number of reviewers per screening phase and (b) how discrepancies will be resolved                                      | Every screening phase will be carried out by two reviewers. Discrepancies will be resolved by discussion between the reviewers.                                                                                                                                                                                                                                                                             |  |
| <i>Define all inclusion and exclusion criteria based on:</i> |                                                                                                                                         |                                                                                                                                                                                                                                                                                                                                                                                                             |  |
| 23.                                                          | Type of study (design)                                                                                                                  | <p>Inclusion criteria: primary research paper presenting pre-clinical animal data (<i>in vivo</i>).</p> <p>Exclusion criteria: research paper presenting <i>in vitro</i> data or <u>clinical data</u>; <u>reviews, conference abstracts, posters</u></p>                                                                                                                                                    |  |
| 24.                                                          | Type of animals/population (e.g. age, gender, disease model)                                                                            | Inclusion criteria:                                                                                                                                                                                                                                                                                                                                                                                         |  |

|     |                                                                 |                                                                                                                                                                                                                                                                                                                                                                                                                                                                                                                                                                                                                                                                                                                                            |  |
|-----|-----------------------------------------------------------------|--------------------------------------------------------------------------------------------------------------------------------------------------------------------------------------------------------------------------------------------------------------------------------------------------------------------------------------------------------------------------------------------------------------------------------------------------------------------------------------------------------------------------------------------------------------------------------------------------------------------------------------------------------------------------------------------------------------------------------------------|--|
|     |                                                                 | <ul style="list-style-type: none"> <li>Data should be acquired in <u>healthy animals</u> or animals with a systemic disease that is proven to have a negative effect on bone healing;</li> <li>Animals used should have reached the age of <u>skeletal maturity</u></li> </ul> <p>Exclusion criteria:</p> <ul style="list-style-type: none"> <li>Data acquired in animals with a <u>disease</u> of which the influence on bone healing properties is not clear;</li> <li><u>Skeletally immature</u> animals</li> </ul>                                                                                                                                                                                                                     |  |
| 25. | Type of intervention (e.g. dosage, timing, frequency)           | <ul style="list-style-type: none"> <li>Inclusion criteria: Data should be presented for animals that received a <u>calcium phosphate based bone substitute with inclusion of one (not multiple) bioinorganic element (i.e. Mg, Sr, Zn, F, Cu, Si, S or Cl)</u> (experimental group);</li> </ul> <p>Data should be presented for animals that received a <u>calcium phosphate based bone substitute without inclusion of a bioinorganic element</u> (control group);</p> <p>Exclusion criteria:</p> <ul style="list-style-type: none"> <li><u>No calcium phosphate based bone substitute</u></li> <li><u>Multiple bioinorganics</u> added to a calcium phosphate based bone substitute</li> <li><u>No relevant control group</u></li> </ul> |  |
| 26. | Outcome measures                                                | <p>Inclusion criteria: <u>histological or (histo)morphometrical data</u> about bone formation should be presented (i.e. percentage of material remnants in the region of interest and percentage of new bone in the region of interest)</p> <p>Exclusion criteria: <u>only other outcome measures</u></p>                                                                                                                                                                                                                                                                                                                                                                                                                                  |  |
| 27. | Language restrictions                                           | <p>Inclusion criteria: all languages</p> <p>Exclusion criteria: none</p>                                                                                                                                                                                                                                                                                                                                                                                                                                                                                                                                                                                                                                                                   |  |
| 28. | Publication date restrictions                                   | <p>Inclusion criteria: articles dated up to May 2017</p> <p>Exclusion criteria: none</p>                                                                                                                                                                                                                                                                                                                                                                                                                                                                                                                                                                                                                                                   |  |
| 29. | Other                                                           | <p>Inclusion criteria: none</p> <p>Exclusion criteria: none</p>                                                                                                                                                                                                                                                                                                                                                                                                                                                                                                                                                                                                                                                                            |  |
| 30. | Sort and prioritize your exclusion criteria per selection phase | <p><b>Selection phase:</b></p> <p><b>1.</b> <i>in vitro</i> or clinical data; reviews, conference abstracts, posters; no calcium phosphate based bone substitute; no bioinorganic added or multiple bioinorganics added per calcium phosphate based bone substitute; no bone</p>                                                                                                                                                                                                                                                                                                                                                                                                                                                           |  |

|                                                                                                |                                                                            |                                                                                                                                                                                                                                                                                                                                                                                                                                             |  |
|------------------------------------------------------------------------------------------------|----------------------------------------------------------------------------|---------------------------------------------------------------------------------------------------------------------------------------------------------------------------------------------------------------------------------------------------------------------------------------------------------------------------------------------------------------------------------------------------------------------------------------------|--|
|                                                                                                |                                                                            | defect<br><br>2. Data acquired in animals with a c disease of which the influence on bone healing properties is not clear; skeletally immature animals; no relevant control group; only outcome measures other than histological and histomorphometrical data;                                                                                                                                                                              |  |
| Study characteristics to be extracted (for assessment of external validity, reporting quality) |                                                                            |                                                                                                                                                                                                                                                                                                                                                                                                                                             |  |
| 31.                                                                                            | Study ID (e.g. authors, year)                                              | First author & year of publication                                                                                                                                                                                                                                                                                                                                                                                                          |  |
| 32.                                                                                            | Study design characteristics (e.g. experimental groups, number of animals) | <ul style="list-style-type: none"> <li>• Number of animals per group.</li> </ul>                                                                                                                                                                                                                                                                                                                                                            |  |
| 33.                                                                                            | Animal model characteristics (e.g. species, gender, disease induction)     | <ul style="list-style-type: none"> <li>• Species/strain;</li> <li>• Male or female;</li> <li>• Age</li> <li>• Healthy animals or animals with a disease impairing bone-healing. <ul style="list-style-type: none"> <li>○ In case of the latter: name of the disease.</li> <li>○ Method of disease induction</li> </ul> </li> <li>• Location (orthotopic (implantation in bone));</li> <li>• Size of defect</li> </ul>                       |  |
| 34.                                                                                            | Intervention characteristics (e.g. intervention, timing, duration)         | <ul style="list-style-type: none"> <li>• Characteristics of experimental group: calcium phosphate based bone substitute with inclusion of one bioinorganic element: <ul style="list-style-type: none"> <li>○ Type of calcium phosphate based bone substitute;</li> <li>○ Type of bioinorganic element;</li> </ul> </li> <li>• Control group: calcium phosphate based bone substitute without inclusion of a bioinorganic element</li> </ul> |  |
| 35.                                                                                            | Outcome measures                                                           | <ul style="list-style-type: none"> <li>• Time period (follow-up)</li> <li>• Histological and histomorphometrical data about bone formation and material remnants</li> <li>• Other outcome measures</li> </ul>                                                                                                                                                                                                                               |  |
| 36.                                                                                            | Other (e.g. drop-outs)                                                     | <ul style="list-style-type: none"> <li>• Reason for drop-out</li> </ul>                                                                                                                                                                                                                                                                                                                                                                     |  |
| Assessment risk of bias (internal validity) or study quality                                   |                                                                            |                                                                                                                                                                                                                                                                                                                                                                                                                                             |  |

|                                                                                        |                                                                                                                                                                                                             |                                                                                                                                                                                                                                                                                                                                                                                                                                  |  |
|----------------------------------------------------------------------------------------|-------------------------------------------------------------------------------------------------------------------------------------------------------------------------------------------------------------|----------------------------------------------------------------------------------------------------------------------------------------------------------------------------------------------------------------------------------------------------------------------------------------------------------------------------------------------------------------------------------------------------------------------------------|--|
| 37.                                                                                    | Specify (a) the number of reviewers assessing the risk of bias/study quality in each study and (b) how discrepancies will be resolved                                                                       | (a) 2 reviewers assessing the risk of bias/study quality in each study<br>(b) Discrepancies will be resolved in a discussion between the reviewers; if necessary by consulting a 3 <sup>rd</sup> party                                                                                                                                                                                                                           |  |
| 38.                                                                                    | Define criteria to assess (a) the internal validity of included studies (e.g. selection, performance, detection and attrition bias) and/or (b) other study quality measures (e.g. reporting quality, power) | <input checked="" type="checkbox"/> <b>By use of SYRCLE's Risk of Bias tool<sup>4</sup></b><br><input type="checkbox"/> By use of SYRCLE's Risk of Bias tool, adapted as follows:<br><input type="checkbox"/> By use of CAMARADES' study quality checklist, e.g. <sup>22</sup><br><input type="checkbox"/> By use of CAMARADES' study quality checklist, adapted as follows:<br><input type="checkbox"/> Other criteria, namely: |  |
| Collection of outcome data                                                             |                                                                                                                                                                                                             |                                                                                                                                                                                                                                                                                                                                                                                                                                  |  |
| 39.                                                                                    | For each outcome measure, define the type of data to be extracted (e.g. continuous/dichotomous, unit of measurement)                                                                                        | <u>histological data</u> : continuous data; descriptive <u>histomorphometrical data</u> about bone formation: continuous data; percentage of new formed bone in a Region Of Interest (ROI).                                                                                                                                                                                                                                      |  |
| 40.                                                                                    | Methods for data extraction/retrieval (e.g. first extraction from graphs using a digital screen ruler, then contacting authors)                                                                             | <ul style="list-style-type: none"> <li>Data extraction from tables, graphs and text: search for values of material remnants and new bone formation / using a digital screen rule</li> <li>If necessary: contact authors for missing data</li> </ul>                                                                                                                                                                              |  |
| 41.                                                                                    | Specify (a) the number of reviewers extracting data and (b) how discrepancies will be resolved                                                                                                              | (a) One reviewer extracting the data, second reviewer checking the data extraction of a random selection of articles<br>(b) By discussion and if necessary consulting a 3 <sup>rd</sup> party                                                                                                                                                                                                                                    |  |
| Data analysis/synthesis                                                                |                                                                                                                                                                                                             |                                                                                                                                                                                                                                                                                                                                                                                                                                  |  |
| 42.                                                                                    | Specify (per outcome measure) how you are planning to combine/compare the data (e.g. descriptive summary, meta-analysis)                                                                                    | <u>histological data</u> : continuous data → descriptive summary<br><u>histomorphometrical data</u> about bone formation and material remnants: continuous data; percentage of new formed bone / material remnants in a Region Of Interest (ROI) → meta-analysis                                                                                                                                                                 |  |
| 43.                                                                                    | Specify (per outcome measure) how it will be decided whether a meta-analysis will be performed                                                                                                              | A minimum of 3                                                                                                                                                                                                                                                                                                                                                                                                                   |  |
| <i>If a meta-analysis seems feasible/sensible, specify (for each outcome measure):</i> |                                                                                                                                                                                                             |                                                                                                                                                                                                                                                                                                                                                                                                                                  |  |
| 44.                                                                                    | The effect measure to be used (e.g. mean difference, standardized mean difference, risk ratio, odds ratio)                                                                                                  | (standardized) Mean difference                                                                                                                                                                                                                                                                                                                                                                                                   |  |
| 45.                                                                                    | The statistical model of analysis (e.g. random or fixed effects model)                                                                                                                                      | Random                                                                                                                                                                                                                                                                                                                                                                                                                           |  |
| 46.                                                                                    | The statistical methods to assess heterogeneity (e.g. I <sup>2</sup> , Q)                                                                                                                                   | I <sup>2</sup>                                                                                                                                                                                                                                                                                                                                                                                                                   |  |
| 47.                                                                                    | Which study characteristics will be examined as potential source of heterogeneity (subgroup analysis)                                                                                                       | Healthy vs. not healthy, species, bone type and bioinorganics                                                                                                                                                                                                                                                                                                                                                                    |  |



|     |                                                                                                                          |                                              |  |
|-----|--------------------------------------------------------------------------------------------------------------------------|----------------------------------------------|--|
| 48. | Any sensitivity analyses you propose to perform                                                                          | Type of defect                               |  |
| 49. | Other details meta-analysis ( <i>e.g.</i> correction for multiple testing, correction for multiple use of control group) | Correction for multiple use of control group |  |
| 50. | The method for assessment of publication bias                                                                            | Funnel plots, visual inspection              |  |
|     |                                                                                                                          |                                              |  |
