# Supplementary material for: Bioinorganic supplementation of calcium phosphate-based bone substitutes to improvein vivoperformance: a systematic review and meta-analysis of animal studies
Source: Royal Society of Chemistry journal article supplement (doi:10.1039/d0bm00599a), 2020-01-01
Supplement: d0bm00599a5.pdf [file d0bm00599a5.pdf]

| Study                        | Total    | Weight     | IV, Random, 95% CI | Mean Difference | Std. Mean Difference |    |               |                       |
|------------------------------|----------|------------|--------------------|-----------------|----------------------|----|---------------|-----------------------|
| Baier2013-1m                 | 0.153    | 0.312      | 9                  | 0               | 0                    | 8  | Not estimable |                       |
| Baier2013-3m                 | 0.403    | 0.730486   | 10                 | 0.343           | 0.432749             | 8  | 1.1%          | 0.09 [-0.84, 1.02]    |
| Baier2013-6m                 | 3.784    | 0.1822923  | 7                  | 0.327           | 0.594                | 9  | 0.6%          | 7.03 [4.06, 10.01]    |
| Bunpetch2018                 | 35.202   | 1.908      | 7                  | 28.324          | 3.873                | 7  | 1.0%          | 2.11 [0.71, 3.50]     |
| Calvo-Guirado2015-8w         | 64.51    | 2.4        | 7                  | 57.62           | 6.3                  | 7  | 1.1%          | 1.35 [0.15, 2.56]     |
| Calvo-Guirado2015a-12w       | 83.59    | 1.2        | 7                  | 75.62           | 3.3                  | 7  | 0.9%          | 3.01 [1.33, 4.68]     |
| Carmo2018-1w                 | 17       | 1.7        | 5                  | 18.2            | 2                    | 5  | 1.0%          | -0.58 [-1.87, 0.70]   |
| Carmo2018-6w                 | 32       | 4.15       | 5                  | 28.2            | 3.8                  | 5  | 1.0%          | 0.86 [-0.47, 2.19]    |
| Chandran2016                 | 0.926    | 0.047      | 6                  | 0.693           | 0.08                 | 6  | 0.8%          | 3.28 [1.32, 5.24]     |
| Chandran2018                 | 0.24     | 0.04       | 2                  | 0.08            | 0.03                 | 2  | 0.0%          | 2.59 [-12.18, 17.35]  |
| Cho2014                      | 40.8     | 4.1        | 8                  | 9.9             | 1.2                  | 8  | 0.4%          | 9.67 [5.69, 13.65]    |
| Chou2013                     | 902.314  | 23.716     | 10                 | 704.855         | 38.108               | 10 | 0.8%          | 5.96 [3.72, 8.20]     |
| Costa2016-1m                 | 11.27    | 4.654      | 6                  | 22.45           | 3.919                | 6  | 0.9%          | -2.40 [-4.03, -0.77]  |
| Costa2016-6m                 | 17.511   | 4.164      | 6                  | 12.001          | 3.796                | 6  | 1.0%          | 1.28 [-0.02, 2.57]    |
| Deng2017-4w                  | 11.212   | 5.017      | 4                  | 7.14            | 4.95                 | 4  | 1.0%          | 0.71 [-0.76, 2.18]    |
| Deng2017-8w                  | 29.698   | 4.951      | 4                  | 18.38           | 4.95                 | 4  | 0.8%          | 1.99 [0.04, 3.93]     |
| Deng2017a-12w                | 47.677   | 4.949      | 4                  | 25.859          | 4.848                | 4  | 0.6%          | 3.87 [0.87, 6.88]     |
| DeVal2012-Si1.5              | 2.6      | 0.4        | 20                 | 2.17            | 0.4                  | 10 | 1.2%          | 1.05 [0.24, 1.86]     |
| DeVal2012-Si3                | 2.44     | 0.3        | 20                 | 2.17            | 0.4                  | 10 | 1.2%          | 0.78 [-0.01, 1.57]    |
| Elgali2016                   | 7.362    | 1.579921   | 6                  | 4.569           | 2.454389             | 6  | 1.0%          | 1.25 [-0.04, 2.53]    |
| Guo2018-4w                   | 6.599    | 0.77       | 10                 | 4.635           | 1.061                | 10 | 1.1%          | 2.03 [0.91, 3.15]     |
| Guo2018-8w                   | 9.785    | 0.611      | 10                 | 7.787           | 0.385                | 10 | 1.0%          | 3.75 [2.18, 5.31]     |
| Hing2006-1w-Si0.2            | 11.203   | 4.261      | 4                  | 8.482           | 6.313                | 1  | 0.7%          | 0.46 [-1.81, 2.74]    |
| Hing2006-1w-Si0.4            | 10.612   | 7.771      | 4                  | 8.482           | 6.313                | 1  | 0.8%          | 0.20 [-2.01, 2.41]    |
| Hing2006-1w-Si0.8            | 14.911   | 2.288      | 4                  | 8.482           | 6.313                | 1  | 0.5%          | 2.04 [-1.47, 5.56]    |
| Hing2006-1w-Si1.5            | 8.758    | 2.485      | 4                  | 8.482           | 6.313                | 1  | 0.8%          | 0.08 [-2.11, 2.27]    |
| Hing2006-3w-Si0.2            | 27.337   | 7.101      | 4                  | 37.692          | 8.521                | 1  | 0.7%          | -1.06 [-3.68, 1.55]   |
| Hing2006-3w-Si0.4            | 27.87    | 13.669     | 4                  | 37.692          | 8.521                | 1  | 0.7%          | -0.52 [-2.82, 1.78]   |
| Hing2006-3w-Si0.8            | 50.296   | 8.521      | 4                  | 37.692          | 8.521                | 1  | 0.7%          | 1.08 [-1.55, 3.70]    |
| Hing2006-3w-Si1.5            | 33.846   | 5.444      | 4                  | 37.692          | 8.521                | 1  | 0.7%          | -0.51 [-2.81, 1.78]   |
| Hing2006-6w-Si0.2            | 32.485   | 7.337      | 4                  | 36.745          | 9.349                | 1  | 0.7%          | -0.42 [-2.69, 1.84]   |
| Hing2006-6w-Si0.4            | 33.432   | 11.538     | 4                  | 36.745          | 9.349                | 1  | 0.8%          | -0.21 [-2.42, 2.00]   |
| Hing2006-6w-Si0.8            | 46.509   | 5.799      | 4                  | 36.745          | 9.349                | 1  | 0.6%          | 1.22 [-1.52, 3.97]    |
| Hing2006-6w-Si1.5            | 3.787    | 7.968      | 4                  | 36.745          | 9.349                | 1  | 0.3%          | -3.01 [-7.61, 1.60]   |
| Hing2006a-12w-Si0.2          | 26.588   | 12.663     | 4                  | 54.201          | 9.467                | 1  | 0.6%          | -1.59 [-4.65, 1.47]   |
| Hing2006a-12w-Si0.4          | 31.085   | 14.833     | 4                  | 54.201          | 9.467                | 1  | 0.6%          | -1.13 [-3.80, 1.54]   |
| Hing2006a-12w-Si0.8          | 61.775   | 13.314     | 4                  | 54.201          | 9.467                | 1  | 0.7%          | 0.41 [-1.85, 2.67]    |
| Hing2006a-12w-Si1.5          | 51.657   | 9.704      | 4                  | 54.201          | 9.467                | 1  | 0.8%          | -0.19 [-2.40, 2.02]   |
| Inoue2005-1w-Fi0.48          | 0.172    | 0.03677    | 2                  | 0.046           | 0.012728             | 1  | 0.7%          | 0.00 [-2.40, 2.40]    |
| Inoue2005-1w-Fi0.91          | 0.2      | 0.031113   | 2                  | 0.046           | 0.012728             | 1  | 0.7%          | 0.00 [-2.40, 2.40]    |
| Inoue2005-1w-Fi2.23          | 0.108    | 0.031113   | 2                  | 0.046           | 0.012728             | 1  | 0.7%          | 0.00 [-2.40, 2.40]    |
| Inoue2005-2w-Fi0.48          | 0.27     | 0.060811   | 2                  | 0.328           | 0.031113             | 1  | 0.7%          | 0.00 [-2.40, 2.40]    |
| Inoue2005-2w-Fi0.91          | 0.293    | 0.052326   | 2                  | 0.328           | 0.031113             | 1  | 0.7%          | 0.00 [-2.40, 2.40]    |
| Inoue2005-2w-Fi2.23          | 0.323    | 0.04384062 | 2                  | 0.328           | 0.0311127            | 1  | 0.7%          | 0.00 [-2.40, 2.40]    |
| Kamitakahara2016-4w          | 38.419   | 9.434      | 3                  | 19.823          | 3.054                | 3  | 0.7%          | 2.12 [-0.48, 4.72]    |
| Kamitakahara2016-8w          | 38.746   | 8.016      | 3                  | 23.776          | 4.826                | 3  | 0.7%          | 1.81 [-0.56, 4.18]    |
| Kamitakahara2016a-12w        | 30.02    | 6.898      | 3                  | 23.586          | 12.406               | 3  | 0.9%          | 0.51 [-1.16, 2.19]    |
| Kamitakahara2016a-24w        | 34.138   | 7.362      | 3                  | 25.303          | 5.453                | 3  | 0.8%          | 1.09 [-0.82, 3.01]    |
| Kawamura2000-TCP-Zn0.063     | 18.827   | 9.362      | 6                  | 13.086          | 6.389                | 2  | 0.9%          | 0.56 [-1.09, 2.20]    |
| Kawamura2000-TCP-Zn0.316     | 22.825   | 13.052     | 6                  | 13.086          | 6.389                | 2  | 0.9%          | 0.69 [-0.98, 2.36]    |
| Kawamura2000-TCP-Zn0.633     | 11.823   | 5.695      | 6                  | 13.086          | 6.389                | 2  | 0.9%          | -0.19 [-1.79, 1.42]   |
| Kawamura2000a-TCP/HA-Zn0.063 | 18.861   | 7.141      | 6                  | 18.952          | 8.2                  | 2  | 0.9%          | -0.01 [-1.61, 1.59]   |
| Kawamura2000a-TCP/HA-Zn0.316 | 28.952   | 11.254     | 6                  | 18.952          | 8.2                  | 2  | 0.9%          | 0.80 [-0.89, 2.50]    |
| Kawamura2000a-TCP/HA-Zn0.633 | 13.497   | 6.27       | 6                  | 18.952          | 8.2                  | 2  | 0.9%          | -0.72 [-2.39, 0.96]   |
| Kawamura2003-2w              | 28.021   | 8.576      | 6                  | 30.035          | 5.908                | 6  | 1.1%          | -0.25 [-1.39, 0.89]   |
| Kawamura2003-4w              | 28.025   | 2.051      | 6                  | 32.375          | 9.108                | 6  | 1.1%          | -0.61 [-1.78, 0.56]   |
| Kawamura2003-6w              | 16.862   | 12.393     | 6                  | 16.123          | 11.815               | 6  | 1.1%          | 0.06 [-1.08, 1.19]    |
| Kawamura2003a-12w            | 6.262    | 5.277      | 6                  | 8.925           | 3.508                | 6  | 1.1%          | -0.55 [-1.71, 0.61]   |
| Kawamura2003a-24w            | 2.208    | 1.362      | 6                  | 6.217           | 4.062                | 6  | 1.0%          | -1.22 [-2.50, 0.06]   |
| Kawamura2003a-60w            | 1.862    | 1.069      | 6                  | 3.354           | 1.262                | 6  | 1.0%          | -1.18 [-2.45, 0.09]   |
| Ke2017-CaPSi-6w              | 11.661   | 0.663      | 8                  | 7.802           | 0.629                | 4  | 0.6%          | 5.46 [2.53, 8.38]     |
| Ke2017-CaPSi-12w             | 24.149   | 1.093      | 8                  | 14.294          | 0.911                | 4  | 0.3%          | 8.73 [4.30, 13.16]    |
| Ke2017-CaPSi-18w             | 35.379   | 0.928      | 8                  | 22.394          | 1.292                | 4  | 0.2%          | 11.41 [5.71, 17.11]   |
| Ke2017-SiCaP-6w              | 9.723    | 0.928      | 8                  | 7.802           | 0.629                | 4  | 1.0%          | 2.09 [0.51, 3.66]     |
| Ke2017-SiCaP-12w             | 20.555   | 0.895      | 8                  | 14.294          | 0.911                | 4  | 0.5%          | 6.42 [3.07, 9.78]     |
| Ke2017-SiCaPa-18w            | 26.683   | 1.557      | 8                  | 22.394          | 1.292                | 4  | 0.9%          | 2.67 [0.90, 4.44]     |
| Li2009                       | 4.276    | 3.523      | 6                  | 2.08            | 1.724                | 6  | 1.1%          | 0.73 [-0.46, 1.92]    |
| Li2016a                      | 54.175   | 10.875     | 10                 | 36.127          | 1.98                 | 10 | 1.1%          | 2.21 [1.05, 3.37]     |
| Li2016b-1m                   | 20.492   | 2.492      | 10                 | 6.202           | 0.82                 | 10 | 0.6%          | 7.38 [4.68, 10.08]    |
| Li2016b-2m                   | 45.533   | 1.967      | 10                 | 34.317          | 3.484                | 10 | 1.0%          | 3.80 [2.22, 5.38]     |
| Li2018-4w                    | 15.163   | 3.053      | 5                  | 10.224          | 7.787                | 5  | 1.0%          | 0.75 [-0.56, 2.06]    |
| Li2018-8w                    | 32.848   | 2.913      | 5                  | 25.733          | 8.067                | 5  | 1.0%          | 1.06 [-0.32, 2.44]    |
| Liu2013-4w-Si50              | 20.805   | 11.888     | 6                  | 16.084          | 11.398               | 3  | 1.0%          | 0.36 [-1.05, 1.76]    |
| Liu2013-4w-Si80              | 31.157   | 7.832      | 6                  | 16.084          | 11.398               | 3  | 0.9%          | 1.49 [-0.17, 3.15]    |
| Liu2013a-12w-Si50            | 23.706   | 8.112      | 6                  | 33.566          | 11.014               | 3  | 1.0%          | -0.97 [-2.48, 0.54]   |
| Liu2013a-12w-Si80            | 32.692   | 9.86       | 6                  | 33.566          | 11.014               | 3  | 1.0%          | -0.08 [-1.46, 1.31]   |
| Liu2013a-26w-Si50            | 29.067   | 12.214     | 6                  | 17.272          | 8.695                | 3  | 1.0%          | 0.93 [-0.57, 2.42]    |
| Liu2013a-26w-Si80            | 33.38    | 9.72       | 6                  | 17.272          | 8.695                | 3  | 0.9%          | 1.52 [-0.15, 3.19]    |
| Machado2016                  | 26.861   | 5.2734     | 5                  | 31.846          | 6.3886               | 5  | 1.0%          | -0.77 [-2.08, 0.54]   |
| Mohan2013-4w                 | 46.77    | 0.086      | 3                  | 31.28           | 0.038                | 3  | 0.0%          | 186.39 [6.40, 366.38] |
| Mohan2013a-12w               | 65.18    | 0.0125     | 3                  | 52.8            | 0.077                | 3  | 0.0%          | 179.55 [6.17, 352.93] |
| Patel2005-6w-Si0.8           | 20.236   | 2.762      | 4                  | 14.004          | 1.221                | 2  | 0.7%          | 2.02 [-0.57, 4.60]    |
| Patel2005-6w-Si1.5           | 23.019   | 2.484      | 4                  | 14.004          | 1.221                | 2  | 0.5%          | 3.23 [-0.32, 6.77]    |
| Patel2005a-12w-Si0.8         | 29.122   | 3.854      | 4                  | 23.019          | 1.927                | 2  | 0.8%          | 1.41 [-0.77, 3.58]    |
| Patel2005a-12w-Si1.5         | 27.859   | 2.591      | 4                  | 23.019          | 1.927                | 2  | 0.7%          | 1.59 [-0.70, 3.87]    |
| Preethanath2016              | 21.1     | 1.7        | 8                  | 12.8            | 4.9                  | 8  | 1.0%          | 2.14 [0.84, 3.44]     |
| Reitmaier2018-6w-SrUL        | 11.759   | 5.075      | 7                  | 9.498           | 2.01                 | 7  | 1.1%          | 0.55 [-0.53, 1.62]    |
| Reitmaier2018a-6w-SrL        | 13.819   | 5.578      | 7                  | 12.162          | 3.618                | 7  | 1.1%          | 0.33 [-0.73, 1.39]    |
| Reitmaier2018b-26w-SrUL      | 29.517   | 17.695     | 7                  | 13.346          | 4.461                | 7  | 1.1%          | 1.17 [0.01, 2.34]     |
| Reitmaier2018c-26w-SrL       | 44.411   | 4.759      | 7                  | 24.833          | 5.973                | 7  | 0.9%          | 3.39 [1.58, 5.21]     |
| Rentsch2018-Cr10             | 38.077   | 6.923      | 10                 | 31.539          | 9.904                | 5  | 1.1%          | 0.77 [-0.35, 1.89]    |
| Rentsch2018-Cr50             | 48.125   | 8.221      | 10                 | 31.539          | 9.904                | 5  | 1.0%          | 1.78 [0.47, 3.08]     |
| Roh2016-4w                   | 0.215    | 0.028      | 6                  | 0.166           | 0.005                | 3  | 0.9%          | 1.83 [0.04, 3.62]     |
| Roh2016-8w                   | 0.225    | 0.009      | 6                  | 0.188           | 0.021                | 3  | 0.8%          | 2.43 [0.39, 4.46]     |
| Suruagy2016                  | 24.74325 | 14.3781    | 5                  | 17.09125        | 14.73765             | 5  | 1.0%          | 4.07 [-0.79, 1.74]    |
| Tao2018                      | 33.066   | 3.553      | 5                  | 22.178          | 2.694                | 5  | 0.8%          | 3.12 [0.97, 5.27]     |
| Thormann2013                 | 11.673   | 2.84       | 15                 | 4.191           | 7.07                 | 15 | 1.2%          | 1.35 [0.55, 2.16]     |
| Tian2009-4w                  | 13.782   | 0.62       | 8                  | 9.872           | 0.433                | 8  | 0.6%          | 6.91 [3.99, 9.84]     |
| Tian2009-6w                  | 26.923   | 1.118      | 8                  | 18.846          | 0.769                | 8  | 0.5%          | 7.96 [4.63, 11.28]    |
| Tian2009a-16w                | 44.487   | 1.282      | 8                  | 39.295          | 1.182                | 8  | 0.9%          | 3.98 [2.11, 5.85]     |
| Vahabzadeh2015-4w-Si0.5      | 77.583   | 1.404      | 3                  | 65.341          | 7.953                | 1  | 0.0%          | 4.98 [-23.30, 33.26]  |
| Vahabzadeh2015-4w-Si0.8      | 76.374   | 2.105      | 3                  | 65.341          | 7.953                | 1  | 0.0%          | 3.00 [-14.10, 20.09]  |
| Vahabzadeh2015-4w-Si1.1      | 70.059   | 1.52       | 3                  | 65.341          | 7.953                | 1  | 0.1%          | 1.77 [-8.51, 12.06]   |
| Vahabzadeh2015-8w-Si0.5      | 79.299   | 4.055      | 3                  | 67.797          | 1.951                | 1  | 0.1%          | 1.62 [-7.82, 11.07]   |
| Vahabzadeh2015-8w-Si0.8      | 71.034   | 3.47       | 3                  | 67.797          | 1.951                | 1  | 0.4%          | 0.53 [-3.24, 4.30]    |
| Vahabzadeh2015-8w-Si1.1      | 74.737   | 5.653      | 3                  | 67.797          | 1.951                | 1  | 0.3%          | 0.70 [-3.87, 5.27]    |
| Valiense2016-4w              | 16.713   | 9.72       | 6                  | 17.669          | 9.417                | 6  | 1.1%          | -0.09 [-1.22, 1.04]   |
| Valiense2016a-12w            |          |            |                    |                 |                      |    |               |                       |
