# Supplementary figures and images for: Bioinorganic supplementation of calcium phosphate-based bone substitutes to improvein vivoperformance: a systematic review and meta-analysis of animal studies
Source: Royal Society of Chemistry journal article supplement (doi:10.1039/d0bm00599a), 2020-01-01

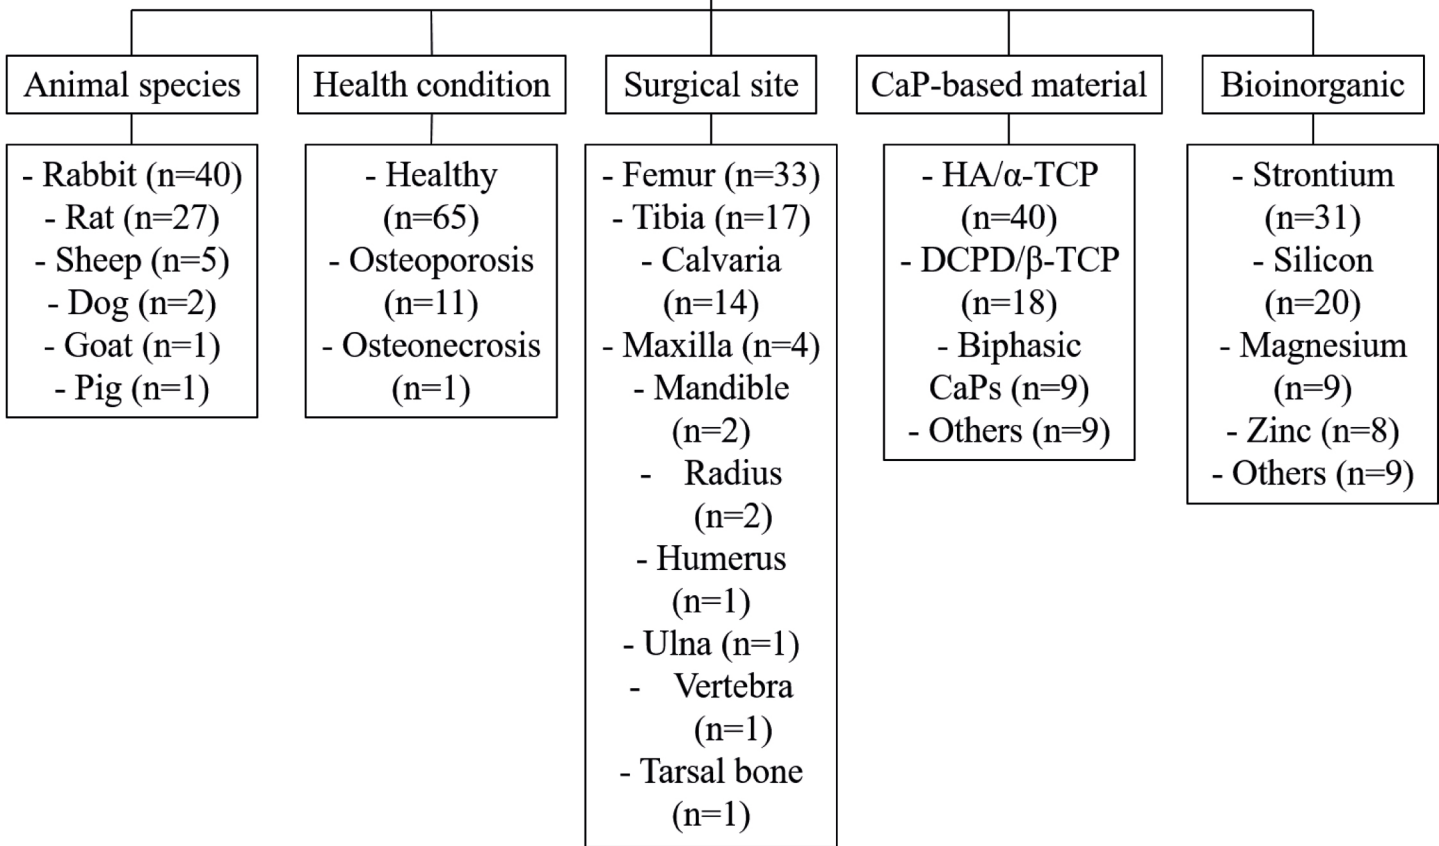

Supplement: d0bm00599a4.pdf [file d0bm00599a4.pdf]

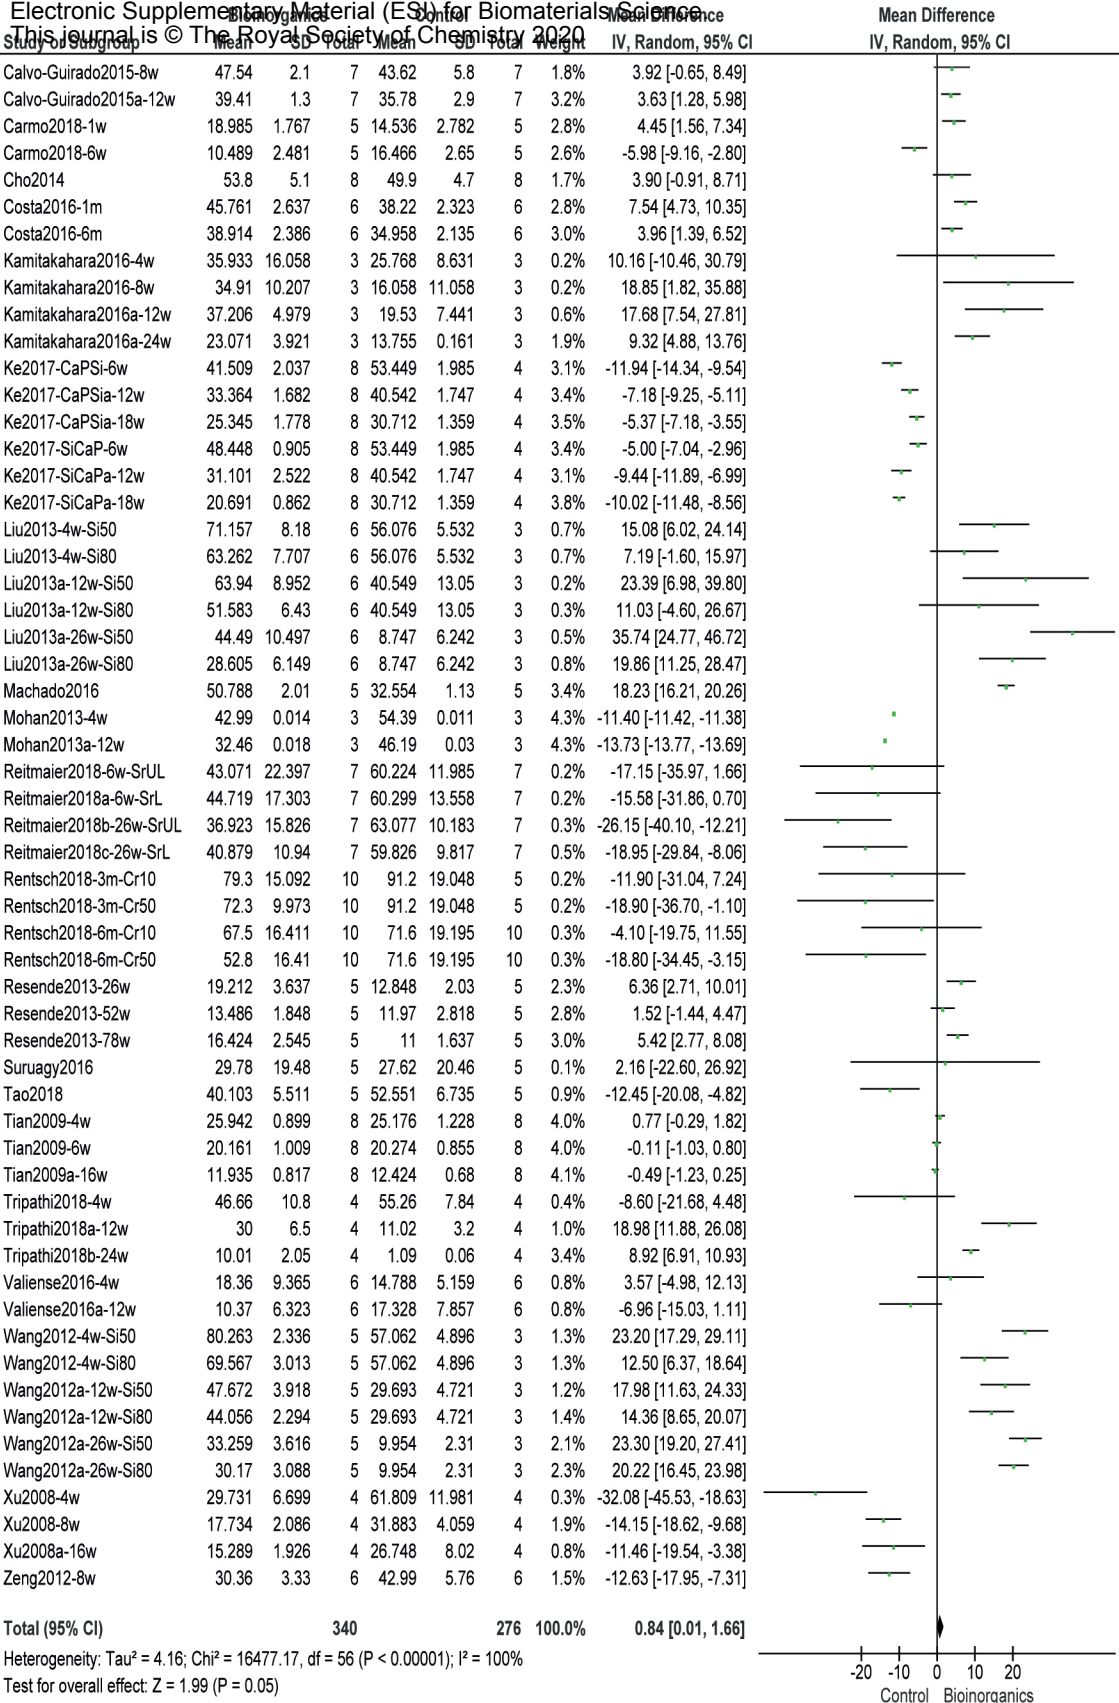

Supplement: d0bm00599a6.pdf [file d0bm00599a6.pdf]
